# Patient Blood Management

## Effectiveness and Future Potential

Donat R. Spahn, M.D., F.R.C.A., Manuel Muñoz, M.D., Andrew A. Klein, M.D., F.R.C.A., Jerrold H. Levy, M.D., F.A.H.A., F.C.C.M., Kai Zacharowski, M.D., Ph.D., M.L., F.R.C.A.

Before major surgery, 30 to 40% of patients are anemic, an important consideration that is associated with increased erythrocyte transfusions, prolonged hospital length of stay, more frequent intensive care admissions, infections, and thromboembolic events, and mortality.<sup>1–4</sup> Surgical bleeding contributes to anemia, increases transfusions, and independently increases mortality.<sup>5</sup> In addition, transfusion of allogeneic blood products is associated with increased morbidity and mortality<sup>6</sup> and increased costs, and allogeneic blood products are a limited resource.<sup>6–8</sup> Therefore, as a pragmatic solution, the concept of Patient Blood Management was developed and published in its preliminary form, first in the anesthesia literature as an editorial in *ANESTHESIOLOGY* in 2008.<sup>9</sup> The authors hypothesized that “Patient Blood Management will decrease the use of allogeneic erythrocyte transfusion and its cost and adverse sequelae significantly.” Currently, 12 yr later, we can conclude this is indeed the case.<sup>10–12</sup>

Patient Blood Management has been defined as “the timely application of evidence-based medical and surgical concepts designed to maintain hemoglobin concentration, optimize hemostasis and minimize blood loss in an effort to improve patient outcome” (<https://www.sabm.org/>; accessed January 13, 2020). It comprises three pillars: (1) correction of anemia with hematinic medication; (2) reduction of erythrocyte loss and (3) tolerance of anemia; and each with a number of measures that can be used across perioperative periods (table 1).

### Preoperative Period

Preoperative anemia is common in patients scheduled for major surgery,<sup>1–4</sup> ranging from 8% in patients undergoing radical prostatectomy to 64% in gynecologic surgery.<sup>3</sup> As expected, the prevalence of iron deficiency (ferritin less than 30 ng/ml or ferritin less than 100 ng/ml with transferrin saturation less than 20% or C-reactive protein greater than 5 mg/l) is high in anemic patients (absolute iron deficiency, 62%).<sup>3</sup> Interestingly, iron deficiency was also highly prevalent (33% overall) in nonanemic patients with 60% in gynecologic surgery and 44% in colorectal cancer surgery.<sup>3</sup> Also in

cardiac surgery, iron deficiency is frequent with approximately 50% of anemic patients and 20% of nonanemic patients having absolute iron deficiency.<sup>3</sup> Ferritin less than 100 ng/ml has recently been shown to be associated with a more than three-fold increase in 90-day mortality irrespective of the presence or absence of anemia.<sup>13</sup> While several definitions of iron deficiency have been used, the most accepted one is a ferritin less than 100 ng/ml or transferrin saturation less than 20%.<sup>14,15</sup>

Multiple studies support the benefits of treating preoperative anemia. In orthopedic surgery, treatment with intravenous iron and subcutaneous erythropoietin 1 to 3 days before surgery was associated with a reduction of erythrocyte transfusion rate from 37 to 24%, nosocomial infections from 12 to 8%, and hospital stay from 11.7 to 10.7 days. In patients with hip fractures, this treatment was associated with a decrease in mortality from 9.4 to 4.8%.<sup>16</sup> This reduction in infection rate is in contrast to an increase of infectious complications due to intravenous iron treatment described in an older meta-analysis.<sup>17</sup> However, in this meta-analysis only 11 of 75 included studies were from surgery.<sup>17</sup> A 21% reduction of postoperative infections was also found in a study in 605,000 surgical patients,<sup>10</sup> as well as in a recent meta-analysis (–9%).<sup>11</sup> In a prospective randomized study in patients undergoing gastrointestinal surgery with preoperative iron deficiency anemia (ferritin less than 300 ng/ml, transferrin saturation less than 25%, hemoglobin less than 12.0 g/dl for women, and less than 13.0 g/dl for men), it was shown that intravenous iron treatment approximately 10 days before surgery reduced erythrocyte transfusions and was associated with a shortened length of hospital stay from 9 to 6 days.<sup>18</sup> Among anemic or iron-deficient patients (ferritin less than 100 ng/ml) undergoing cardiac surgery, it was recently shown in a prospective randomized, double-blind study that combination treatment with intravenous iron, subcutaneous erythropoietin, vitamin B12, and oral folic acid 1 day before surgery reduced erythrocyte transfusions from a median of 1 to 0 units with similar secondary clinical outcomes in both groups.<sup>19</sup> Interestingly, there are no studies describing anemia or iron deficiency

This article is featured in “This Month in Anesthesiology,” page 1A.

Submitted for publication August 30, 2019. Accepted for publication January 22, 2020. Published online first on February 25, 2020. From the Institute of Anesthesiology, University of Zurich and University Hospital Zurich, Zurich, Switzerland (D.R.S.); the Department of Surgical Specialties, Biochemistry and Immunology, School of Medicine, University of Málaga, Málaga, Spain (M.M.); the Department of Anaesthesia and Intensive Care, Royal Papworth Hospital, Cambridge, United Kingdom (A.A.K.); the Departments of Anesthesiology and Critical Care, Duke University School of Medicine, Durham, North Carolina (J.H.L.); and the Department of Anesthesiology, Intensive Care Medicine and Pain Therapy University Hospital Frankfurt, Germany (K.Z.).

Copyright © 2020, the American Society of Anesthesiologists, Inc. All Rights Reserved. *Anesthesiology* 2020; 133:212–22. DOI: 10.1097/ALN.0000000000003198

**Table 1.** Suggested Approach to Perioperative Patient Blood Management

|                                                          | Elective     |                |               | Emergency |
|----------------------------------------------------------|--------------|----------------|---------------|-----------|
|                                                          | Period       |                |               |           |
|                                                          | Preoperative | Intraoperative | Postoperative |           |
| <b>Correct anemia and iron deficiency</b>                |              |                |               |           |
| Iron (IV) + EPO + vitamin B12 + folic acid (see table 2) |              |                |               |           |
| <b>Reduce perioperative erythrocyte loss</b>             |              |                |               |           |
| Improved surgical technique                              |              |                |               |           |
| Cell salvage and re-transfusion                          |              |                |               |           |
| Acute normovolemic hemodilution                          |              |                |               |           |
| Avoiding coagulopathy                                    |              |                |               |           |
| Monitoring of coagulation                                |              |                |               |           |
| Individualized and goal-directed coagulation algorithm   |              |                |               |           |
| Antifibrinolytics                                        |              |                |               |           |
| Fibrinogen                                               |              |                |               |           |
| PCC                                                      |              |                |               |           |
| Factor XIII                                              |              |                |               |           |
| Low CVP, no hypertension, normothermia                   |              |                |               |           |
| Reduced blood draws for laboratory testing               |              |                |               |           |
| <b>Tolerance of anemia</b>                               |              |                |               |           |
| Tolerate low hemoglobin values (restrictive TT)          |              |                |               |           |
| Optimization of hemodynamics and oxygenation             |              |                |               |           |

Blue refers to elective surgery, orange to emergency surgery. Dark colors indicate application to all patients (without specific contraindications) and bright colors indicate application to some patient groups.

CVP, central venous pressure; EPO, erythropoietin; IV, intravenous; PCC, prothrombin complex concentrate; TT, transfusion trigger.

treatment specifically before gynecologic surgery. However, we expect that also on gynecologic surgery preoperative treatment of anemia and iron deficiency is beneficial.

Although late anemia treatment can be successful, early (2 to 3 weeks before surgery) detection of anemia and iron deficiency is important for ideal preoperative correction. A group of experts supports this strongly based on their exhaustive literature research for evidence-based recommendation for Patient Blood Management.<sup>20</sup> Also others recommend not proceeding with elective surgery in patients with correctable anemia until appropriately treated.<sup>21</sup> This is particularly important in patients scheduled for operations associated with a perioperative erythrocyte transfusion rate of greater than or equal to 10% or an expected blood loss of greater than or equal to 500 ml.<sup>3,22</sup> This analysis needs to be done by each hospital to define their own higher-risk procedures. Then, surgeons and anesthesiologists need to decide which specialty is responsible for preoperative anemia and iron deficiency detection and treatment. Obviously, it is the surgeon's task to schedule a major operation, including the date of the operation, 2 to 3 weeks in advance whenever possible. Also, measuring hemoglobin and iron parameters (ferritin and transferrin saturation)<sup>14</sup> at the time of decision making for major surgery can be done in the most efficacious way at the surgeon's consultation. Alternatively, referring physicians may measure hemoglobin and iron parameters already at their consultation, and refer patients to the hospital with these

parameters measured. In any case, task assignment and responsibility need to be clearly defined. Finally, monitoring and feedback of the agreed upon processes is key for efficacious implementation.

An algorithm regarding preoperative anemia and iron deficiency testing and treatment needs to be defined. A potential algorithm is depicted in table 2. A group of experts<sup>20</sup> only assign a conditional recommendation for preoperative iron supplementation in patients with iron deficiency anemia, despite the fact that their own analysis yielded a risk reduction for the number of erythrocyte transfusions to 0.47 (0.28 to 0.79;  $P = 0.005$ ). They assigned a conditional recommendation against the routine use of erythropoietin in preoperatively anemic patients, despite a significant reduction of erythrocyte transfusions due to potential thromboembolic events which did not achieve statistical significance in their analysis. Indeed, erythropoietin should not be used routinely, but based on an individual risk-benefit analysis. Patients with severe cerebrovascular disease and history of recent severe thromboembolic events should not be treated with erythropoietin. Nevertheless, in patients with renal anemia or anemia of inflammation, a combination treatment with intravenous iron and erythropoietin has clearly been recommended<sup>15</sup> and was found to be efficacious in a recent prospective randomized trial without increased thromboembolic events.<sup>19</sup> The lower the preoperative hemoglobin and the shorter the time to surgery is, the more liberally erythropoietin may be used. In

**Table 2.** Anemia Management Algorithm of the University Hospital of Zurich, Switzerland

| Condition    |             |     |       |             |          |                                                                                                     |
|--------------|-------------|-----|-------|-------------|----------|-----------------------------------------------------------------------------------------------------|
| Hb*          | Ferritin    |     | TSAT  | CCL         | CRP      | Treatment                                                                                           |
| Hb < 130 g/l | < 100 ng/ml | or  | < 20% | ≥ 50 ml/min |          | IV iron: 20 mg/kg†‡<br>SC vitamin B12: 1 mg§<br>PO folic acid: 5 mg                                 |
| Hb < 130 g/l | ≥ 100 ng/ml | and | ≥ 20% | < 50 ml/min |          | SC epoetin alpha 600 U/kg BW#<br>IV iron: 20 mg/kg†<br>SC vitamin B12: 1 mg§<br>PO folic acid: 5 mg |
| Hb < 130 g/l | ≥ 100 ng/ml | and | ≥ 20% |             | > 5 mg/l | SC epoetin alpha 600 U/kg BW#<br>IV iron: 20 mg/kg†<br>SC vitamin B12: 1 mg§<br>PO folic acid: 5 mg |
| Hb ≥ 130 g/l | < 100 ng/ml | or  | < 20% |             |          | IV iron 20 mg/kg†                                                                                   |

\*Applies to women and men. †With some IV iron preparations maximum dose limitations need to be respected. ‡If time to surgery is less than or equal to 5 days, add SC epoetin alpha 600 U/kg BW. §Indicates some vitamin B12 formulations may be administered intramuscularly. ||Indicates until day of surgery. #Usually, total dose is limited to 40,000 U. BW, body weight; CCL, creatinine clearance; CRP, C-reactive protein; Hb, hemoglobin; IV, intravenous; PO, by mouth; SC, subcutaneous; TSAT, transferrin saturation.

any case, a hemoglobin greater than 130 g/l is the target and hemoglobin concentrations greater than 150 g/l need to be avoided.

In various countries, the site of treatment differs significantly. In some countries, these treatments are administered in the hospital, while in others, the referring general practitioner may treat the patient at their consultation. Also, insurance coverage for anemia treatment is likely variable worldwide. In most countries, intravenous iron treatment is covered preoperatively in patients with a documented iron deficiency. The situation regarding erythropoietin is somewhat more diverse. In most countries, erythropoietin is reimbursed in patients with renal insufficiency and renal anemia. With other types of anemia, the situation is less uniform. In the Netherlands, erythropoietin is reimbursed if indicated for the treatment of preoperative anemia; in many other countries this is not the case. However, hospitals always have the option to cover the costs for erythropoietin to treat preoperative anemia and, given the savings in transfusion-related morbidity, it makes institutional investment in such programs well founded.<sup>10</sup>

Another important aspect is the perioperative management of patients receiving preoperative anticoagulation (vitamin K antagonists and direct oral anticoagulants) or dual platelet inhibition. There are several recommendations regarding the perioperative management of patients with oral anticoagulation. Based on the anticoagulant pharmacokinetics and the planned surgery bleeding risk, standard times have been proposed for when to stop the anticoagulant.<sup>23</sup> Such interruption times need to be longer in patients with renal or hepatic insufficiency, or other concomitant medications that interfere with anticoagulant drug metabolism.<sup>24,25</sup> In addition, measuring plasma levels may help guide patient management.<sup>26</sup> This was initially proposed mainly

for emergency cases<sup>26</sup>; however, since rivaroxaban plasma levels of greater than 100 ng/ml have recently been associated with a greater erythrocyte loss,<sup>27</sup> measuring plasma levels may also be indicated in nonemergent surgery, particularly in patients at risk of having higher than expected plasma levels such as those with compromised renal function, very advanced age, comedication with amiodarone, and unknown time of last ingestion.<sup>24</sup> If indeed plasma levels of greater than 100 ng/ml are found, postponing surgery with a high bleeding risk may be justified. Anticoagulation bridging for most patients is not recommended because heparin bridging does not prevent thromboembolic complications and results in more perioperative bleeding.<sup>28–30</sup>

The 2016 American College of Cardiology/American Heart Association guidelines for the perioperative management of patients with coronary stents and dual platelet inhibition recommends delaying elective noncardiac surgery for 30 days after bare metal stent implantation and, optimally 6 months after drug eluting stent implantation. If surgery mandates P2Y12 platelet inhibitor discontinuation, aspirin is recommended to be continued and the P2Y12 platelet inhibitors restarted as soon as possible after surgery. Between 3 and 6 months after drug eluting stent implantation, surgery requiring P2Y12 platelet inhibitor discontinuation can be performed if the risk of delaying surgery further is greater than the expected risk of stent thrombosis.<sup>31</sup> An observational study found a high incidence of major adverse cardiac events of 20%, with a maximum in the first 42 days after stenting despite the fact that 69% of patients used aspirin until 3 days of surgery.<sup>32</sup> Since the majority of coronary events were non-ST elevation myocardial infarctions, a supply–demand imbalance might have occurred.<sup>32</sup> Thus, treatment of preoperative anemia might be particularly important in these patients.

## Intraoperative Period

Surgical techniques have improved in the last decade, and current procedures employing minimally invasive techniques result in decreased blood loss and transfusions synergistic to the goal of Patient Blood Management. This is well established in operations that have changed from an open to a (robotic-assisted) laparoscopic procedure.<sup>33,34</sup> However, far from all operations have changed from an open to a (robotic-assisted) laparoscopic procedure, and within each surgical technique blood loss depends on meticulous hemostasis which is a key aspect of Patient Blood Management.

The use of restrictive erythrocyte transfusion triggers is standard in all Patient Blood Management programs.<sup>11,20</sup> For the majority of patients a transfusion threshold of less than 70 g/l is adequate,<sup>35</sup> and for high-risk cardiac surgical patients, a threshold of less than 75 g/l has been shown to be safe.<sup>36,37</sup> Cell salvage and retransfusion is also an important part of Patient Blood Management programs and in a recent comprehensive meta-analysis has been shown to be associated with a reduction of allogeneic erythrocyte transfusions and a reduction of infection rate, length of hospital stay, and mortality.<sup>38</sup> Acute normovolemic hemodilution is another autotransfusion technique and part of some Patient Blood Management programs as well, and is particularly used in cardiac surgical patients with high hemoglobin levels.<sup>39</sup>

Avoiding intraoperative coagulopathy is also important and its detection and treatment is greatly facilitated by monitoring *via* viscoelastic testing (thromboelastography, thromboelastometry) in combination with laboratory testing and a specific coagulation algorithm.<sup>40–44</sup> Ideally, this algorithm should focus on individualized goal-directed treatment of a specific defect detected with coagulation monitoring.<sup>40–44</sup>

Since fibrinogen is a critical hemostatic protein, in bleeding patients the level should be maintained at greater than or equal to 1.5 g/l.<sup>40,45</sup> Fresh frozen plasma (FFP) is not a good source of fibrinogen as the level varies from 1.0 to 3.0 g/l with mean concentrations of ~2.0 g/l (200 mg/dl)<sup>46</sup>; however, with pathogen inactivation, the mean fibrinogen concentration is below 2.0 g/l.<sup>47</sup> Consequently, FFP administration on its own often does not increase fibrinogen concentration,<sup>48</sup> but does cause hemodilution. This might potentially trigger erythrocyte transfusions without treating the underlying coagulopathy. Another source of fibrinogen is cryoprecipitate.<sup>46</sup> However, this is a multidonor product without any antiviral processing and is not available in many countries due to safety concerns.<sup>46</sup>

The success of individualized goal-directed coagulation algorithms has been shown in cardiac surgery,<sup>49</sup> in major obstetric hemorrhage,<sup>50</sup> and in trauma.<sup>42</sup> Importantly, these studies not only show a relevant reduction in allogeneic blood product administration, but also shorter intensive care unit stay and reduced mortality.<sup>42,49</sup>

Of particular relevance is the early adjunctive use of tranexamic acid in bleeding trauma patients,<sup>51</sup> in patients

with isolated traumatic brain injury<sup>52</sup> or postpartum hemorrhage,<sup>53</sup> and in cardiac surgery.<sup>54</sup> When given within the first 3 h of trauma, tranexamic acid is reported to reduce mortality. Tranexamic acid can also be used prophylactically in most types of surgery, and close to 200 meta-analyses describe its effectiveness in reducing blood loss and erythrocyte transfusions, and in improving postoperative hemoglobin concentration without evidence of increased thromboembolic complications.<sup>55</sup> Nevertheless, the use of tranexamic acid should be restricted to surgery associated with significant blood loss.

## Postoperative Period

Restrictive transfusion thresholds and individualized goal-directed coagulation algorithms remain important in the postoperative period. For the majority of patients the same transfusion thresholds are adequate, like intraoperative thresholds.<sup>35–37</sup> In patients with acute coronary syndrome, several authors agree that a transfusion trigger of a hemoglobin less than 80 g/l might be justified.<sup>56–58</sup> However, an increased prevalence of acute kidney injury<sup>59</sup> and an increased rate of reinfarction in patients with ST-elevation myocardial infarction<sup>60</sup> has been found in transfused patients. Finally, it needs to be stated that most of these patients were not cardiology and not postoperative patients.

Clinicians must remain vigilant on excessive postoperative bleeding and act quickly to control it. Too often ignored is the consideration that anemia persists and may worsen postoperatively but can be successfully treated with intravenous iron and subcutaneous erythropoietin. Treatment of postoperative iron deficiency anemia (hemoglobin, 70 to 120 g/l; ferritin, less than 100 ng/ml or transferrin saturation less than 20%) with intravenous iron improved hemoglobin recovery in the first 4 weeks and reduced postoperative erythrocyte transfusions, postoperative infections, and hospital length of stay.<sup>61</sup> Intravenous iron also increased hemoglobin recovery after gastrectomy<sup>62</sup> and after postpartum hemorrhage.<sup>63</sup> In addition, intravenous iron also reduced fatigue and postnatal depression.<sup>63,64</sup> A recent meta-analysis found that erythropoietin treatment of critically ill trauma patients is associated with a reduction in mortality by 37% (risk ratio, 0.63 [0.40 to 0.79];  $P < 0.0001$ ) without adverse thromboembolic side effects despite no reduction in erythrocyte transfusions.<sup>65</sup> However, after trauma, iron metabolism is disturbed with reduced availability of iron for erythropoiesis.<sup>66</sup> Future studies should investigate whether a combination of erythropoietin and intravenous iron therapy may provide greater efficacy.

On average, approximately 300 ml of blood are drawn per week in intensive care unit patients.<sup>67</sup> Inevitably, this contributes to anemia and need for erythrocyte transfusions. Therefore, efforts are needed to restrict the number of diagnostic blood draws, to use small volume collection tubes and employ in-line sampling systems.<sup>68</sup>



In the context of perioperative management of patients with coronary stents and dual platelet inhibition, an important consideration is when to restart the preoperative medication to avoid thrombotic events. For patients receiving oral anticoagulation or dual antiplatelet inhibition preoperatively, their medications should be restarted 1 to 3 days postoperatively depending on the postoperative risk of bleeding without a loading dose of P2Y<sub>12</sub> platelet inhibitors (e.g., clopidogrel).<sup>23,31</sup>

## Overall Success (Medical, Costs)

Implementing multiple Patient Blood Management measures reduces transfusion of allogeneic blood products and improves the outcome of patients substantially.<sup>10–12</sup> This is elegantly summarized in the recent meta-analysis<sup>11</sup> showing a reduction of erythrocyte transfusions by 39%, hospital length of stay by 0.45 day, major complications by 20%, acute renal failure by 26%, infections by 9%, thromboembolic events by 25%, and mortality by 11% (fig. 1).<sup>69</sup>

Based on Australian data in 605,000 patients from four adult tertiary care hospitals,<sup>10</sup> combined yearly savings of at least 6.8 million dollars was achieved across the four hospitals.<sup>70</sup> Similarly, data in 213,000 patients from a single tertiary care hospital in Switzerland show yearly savings of at least 3.1 million dollars.<sup>71</sup> However, these figures only represent direct blood product acquisition costs and thus underestimate the true costs of blood product administration<sup>7</sup> by at least a factor of three, resulting in yearly cost savings of at least 20 million dollars in the four Australian hospitals and 9 million dollars in the Swiss hospital. This staggering sum still does not include the savings due to fewer complications.<sup>70</sup>

## Implementation Strategies

Patient Blood Management is increasingly recognized and implemented as a standard of care<sup>70</sup> and many strategies are consistent with best practices and common sense. For clinicians wanting to implement Patient Blood Management in their institution, a first step is to analyze the current situation in terms of preoperative hemoglobin level, prevalence of anemia, hemoglobin values before erythrocyte transfusions, and perioperative erythrocyte, FFP, and platelet transfusions. This data is key to convince the decision makers that “something needs to be done.” In addition, such analyses also allow estimation of potential clinical benefits and cost savings. The second step is the introduction of restrictive transfusion triggers in a joint project of anesthesiologists, surgeons, intensivists, and hematologists. The third step is the introduction of an advanced coagulation monitoring and treatment algorithm—again, a joint effort. The fourth step is the early anemia and iron deficiency detection and treatment. Implementing this module may be quite demanding. Of course, it is reasonable to ask surgeons to schedule operations with significant blood loss (greater

than or equal to 500 ml or an erythrocyte transfusion rate greater than or equal to 10%) 2 to 3 weeks before surgery. Even if this request is successful, which is not always the case, all of these patients need to be tracked to assure early treatment by the assigned group of physicians (see also: Preoperative Phase section). In this regard, a custom-made computer program tracking all newly scheduled patients in the electronic operating room scheduling program can be very helpful. This program selects the newly scheduled operations with an expected blood loss of greater than or equal to 500 ml or a perioperative erythrocyte transfusion rate of greater than or equal to 10% and alerts those physicians responsible for anemia and iron deficiency treatment, or sends these patients to a specific dashboard.

The decision where to start a Patient Blood Management program depends on many specific characteristics of the hospital. Generally, orthopedic, colorectal, and cardiac surgery services are the best candidates with which to start, given the high prevalence of preoperative anemia and iron deficiency<sup>3</sup> and significant high blood loss potential.

During introduction and maintenance of Patient Blood Management, data need to be collected continuously to show benefit. The documentation of the success is crucial for the buy-in of additional persons, departments and, finally, the Board of Directors.

Once Patient Blood Management has achieved a certain priority in the institution, the creation of a Patient Blood Management committee is helpful. This committee may be co-chaired by the chairpersons of the Departments of Anesthesiology and Hematology. In addition, the main users of blood products such as the Departments of Cardiac Surgery, Transplant Surgery, Trauma Surgery, and Intensive Care Medicine should be represented. The committee coordinates standard operating procedures, establishes the local list of operations with a perioperative erythrocyte transfusion rate of greater than or equal to 10% or an expected blood loss of greater than or equal to 500 ml and may nominate a patient blood manager. In addition, this committee is to formulate a mission statement for the hospital such as “Elective major surgery is performed in patients with a hemoglobin greater than or equal to 130 g/l (men and women) and in the absence of iron deficiency (ferritin greater than or equal to 100 ng/ml and transferrin saturation greater than or equal to 20%).”

All of the aforementioned developments need to be accompanied by continued education and some form of monitoring with feedback. These are key elements in the implementation and maintenance of a successful Patient Blood Management program. Based on these principles, initial success<sup>72,73</sup> and sustainability was achieved in Perth<sup>74</sup> and Zurich.<sup>71</sup>

Additionally, the group of experts<sup>20</sup> conditionally recommend the introduction of Patient Blood Management. They also suggest further research on the effect of Patient Blood Management programs on adverse events and

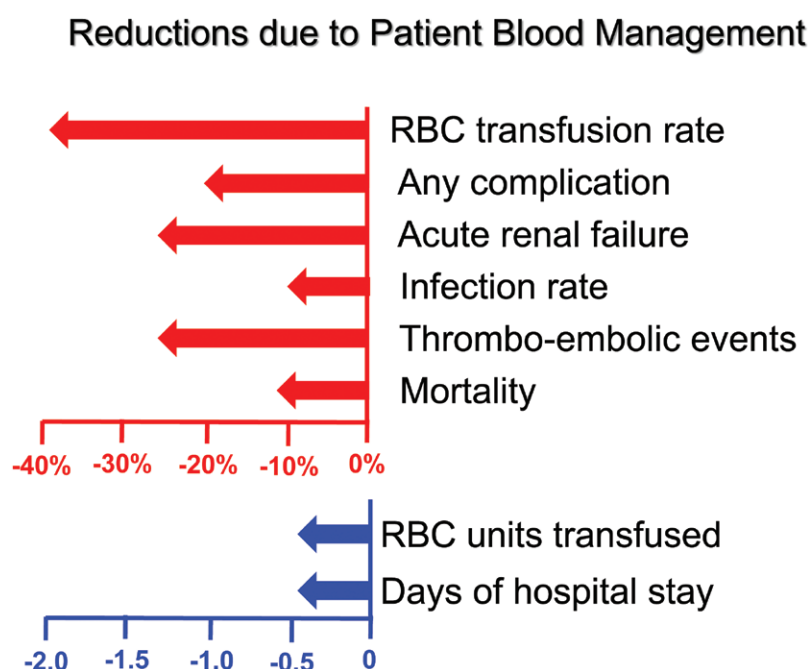

**Fig. 1.** Implementing Patient Blood Management results in reduced erythrocyte transfusions, major postoperative complications including mortality, and hospital length of stay (according to Althoff *et al.*<sup>11</sup>).

patient-important outcomes, compliance, adherence, and acceptability, as well as cost-effectiveness. While research is always important and will ultimately strengthen the arguments for Patient Blood Management, most of these topics have been favorably answered by the meta-analysis,<sup>11</sup> and by the studies on initial success<sup>72,73</sup> and sustainability from Perth<sup>74</sup> and Zurich<sup>71</sup> (fig. 1).

### Limitations and Future Potential

While the primary focus of Patient Blood Management has been on elective surgical patients, urgent or emergent surgical procedures performed can also benefit from many of the strategies (table 1). As has been shown in cardiac surgery,<sup>19</sup> it is never too late to treat preoperative anemia or iron deficiency, a consideration that such treatment should be successful in other surgical disciplines as well. In other patient groups including trauma, anemia, and iron deficiency, treatment with hematinic drugs may be started in the early postoperative phase. In addition, Patient Blood Management measures can also be applied in nonsurgical disciplines as reports suggest, this facilitates a reduction of transfusion of allogeneic blood products and cost savings.<sup>74</sup>

Some centers have not yet started the structured implementation of Patient Blood Management, which should be considered as the new standard of care.<sup>70</sup> Although others have begun easing into Patient Blood Management by changing local transfusion thresholds, greater gains will be achieved by the implementation of other measures such as

treatment of perioperative anemia and iron deficiency and advanced coagulation management.

### Acknowledgment

The authors sincerely thank Aryeh Shander, M.D. (Department of Anesthesiology and Critical Care, Englewood Medical Center, Englewood, New Jersey), for his in-depth editing of this article before submission.

### Research Support

Support was provided solely from institutional and departmental sources.

### Competing Interests

Dr. Spahn's academic department receives grant support from the Swiss National Science Foundation (Berne, Switzerland), the Swiss Society of Anesthesiology and Reanimation (Berne, Switzerland), the Swiss Foundation for Anesthesia Research (Zurich, Switzerland), and Vifor SA (Villars-sur-Glâne, Switzerland). Dr. Spahn is co-chair of the Acute Bleeding Control-Trauma Faculty and is sponsored by unrestricted educational grants from Novo Nordisk Health Care AG (Zurich, Switzerland), CSL Behring GmbH (Marburg, Germany), LFB Biomédicaments (Courtaboeuf Cedex, France), and Octapharma AG (Lachen, Switzerland). Dr. Spahn has received honoraria/travel support for consulting or lecturing from: Danube University of Krems (Austria),

the U.S. Department of Defense (Washington, D.C.), the European Society of Anesthesiology (Brussels, Belgium), the Korean Society for Patient Blood Management (Seoul, Korea), the Korean Society of Anesthesiologists (Seoul, Korea), Baxter/Baxalta AG (Volketswil, Switzerland), Bayer AG (Zürich, Switzerland), Bayer Pharma AG (Berlin, Germany), B. Braun Melsungen AG (Melsungen, Germany), Boehringer Ingelheim GmbH (Basel, Switzerland), Bristol-Myers Squibb (Rueil-Malmaison Cedex, France; Baar, Switzerland), CSL Behring GmbH (Hattersheim am Main, Germany; Berne, Switzerland), Celgene International II Sàrl (Couvett, Switzerland), Daiichi Sankyo AG (Thalwil, Switzerland), Haemonetics (Braintree, Massachusetts), Instrumentation Laboratory (Werfen; Bedford, Massachusetts), LFB Biomédicaments (Courtaboeuf Cedex, France), MerckSharp & Dohme (Kenilworth, New Jersey), Octapharma AG (Lachen, Switzerland), Paion UK Ltd. (Cambridge, United Kingdom), Deutschland GmbH (Aachen, Germany), Pharmacosmos A/S (Holbaek, Denmark), Photonics Healthcare B.V. (Utrecht, The Netherlands), Pierre Fabre Pharma (Alschwil, Switzerland), Roche Diagnostics International Ltd. (Reinach, Switzerland), Sarstedt AG & Co. (Sevelen, Switzerland; Nümbrecht, Germany), Tem International GmbH (Munich, Germany), Vifor Pharma (Munich, Germany; Vienna, Austria; Paris, France; Villars-sur-Glâne, Switzerland), Vifor (International) AG (St. Gallen, Switzerland), and Zuellig Pharma Holdings (Singapore). Dr. Muñoz has received honoraria for consultancy and/or lectures from Pharmacosmos (Holbaek, Denmark) Vifor Pharma Spain (Barcelona, Spain), Zambon (Barcelona, Spain), Pharmanutra (Pisa, Italy), and Celgene (Summit, New Jersey). Dr. Klein is the editor in chief of *Anaesthesia* (London, United Kingdom) and has received unrestricted educational grants, honoraria, or assistance with travel from Pharmacosmos, (Copenhagen, Denmark), Vifor Pharma (Glattbrugg, Switzerland), Fisher and Paykel (Auckland, New Zealand), Masimo (Irvine, California), Hemosonics (Charlottesville, Virginia), Hemonetics (Boston, Massachusetts) and Nordic Pharma (Paris, France). Dr. Levy serves on research steering committees or advisory boards for Boehringer-Ingelheim (Ingelheim am Rhein, Germany), CSL Behring (Marburg, Germany), Instrumentation Laboratories (Bedford, Massachusetts), Octapharma (Hoboken, New Jersey), and Merck (Kenilworth, New Jersey). Dr. Zacharowski's academic department and himself received, within the last 3 yr, research grants, honoraria for advisory boards, and scientific lectures financial support from: Aesculap Akademie GmbH (Tuttlingen, Germany), Affinites Sante (Paris, France), Ashai Kasai Pharma (Waltham, Massachusetts), B. Braun AG (Melsungen, Germany), B. Braun Avitum AG (Melsungen, Germany), Bayer AG (Leverkusen, Germany), Biotest AG (Dreieich, Germany), Christian Doppler Stiftung (Wien, Österreich), CSL Behring GmbH (Marburg, Germany), Cyto Sorbents GmbH (Berlin, Germany), Edward Lifesciences Corporation (Unterschleißheim, Germany), Executive

Insight AG (Baar, Switzerland), Fresenius Kabi GmbH (Bad Homburg, Germany), Fresenius Medical Care (Bad Homburg, Germany), Haemonetics Corporation (Braintree, Massachusetts), Hartmannbund Landesverband (Berlin, Germany), Health Advances GmbH (Zug, Switzerland), Heinen+Löwenstein GmbH (Bad Ems, Germany), Hexal AG (Holzkirchen, Germany), INC Research (München, Germany), Johnson & Johnson (Norderstedt, Germany), Josef Gassner (Weißkirchen im Attergau, Austria), Maquet GmbH (Rastatt, Germany), Markus Lücke Kongress Organisation (Walsrode, Germany), Masimo International (Neuchâtel, Switzerland), med Update GmbH (Wiesbaden, Germany), Medizin & Markt Gesundheitsnetzwerk (München, Germany), MSD Sharp & Dohme GmbH (Haar, Germany), Nordic Group (Hoofddorp, The Netherlands), Nordic Pharma (Ismaning, Germany), Novo Nordisk Pharma GmbH (Mainz, Germany), Pfizer Pharma GmbH (Berlin, Germany), Pharmacosmos (Wiesbaden, Germany), Ratiopharm GmbH (Ulm, Germany), Salvia Medical GmbH (Kronberg, Germany), Schering Stiftung (Berlin, Germany), Schöchl Medical Österreich (Mattsee, Austria), Serumwerke (Bernburg, Germany), Verlag für Printmedien und PR, Forum Sanitas (Leopoldshöhe, Germany), Vifor Pharma GmbH (München, Germany), Wellington (München, Germany), and Werfen (München, Germany).

## Correspondence

Address correspondence to Dr. Spahn: Institute of Anesthesiology, University Hospital Zurich, Rämistrasse 100, 8091 Zurich, Switzerland. donat.spahn@usz.ch. Information on purchasing reprints may be found at [www.anesthesiology.org](http://www.anesthesiology.org) or on the masthead page at the beginning of this issue. ANESTHESIOLOGY's articles are made freely accessible to all readers, for personal use only, 6 months from the cover date of the issue.

## References

1. Musallam KM, Tamim HM, Richards T, Spahn DR, Rosendaal FR, Habbal A, Khreiss M, Dahdaleh FS, Khavandi K, Sfeir PM, Soweid A, Hoballah JJ, Taher AT, Jamali FR: Preoperative anaemia and postoperative outcomes in non-cardiac surgery: a retrospective cohort study. *Lancet* 2011; 378:1396–407
2. Klein AA, Collier TJ, Brar MS, Evans C, Hallward G, Fletcher SN, Richards T: Association of Cardiothoracic Anaesthetists (ACTA): The incidence and importance of anaemia in patients undergoing cardiac surgery in the UK – the first Association of Cardiothoracic Anaesthetists national audit. *Anaesthesia* 2016; 71:627–35
3. Muñoz M, Laso-Morales MJ, Gómez-Ramírez S, Cadellas M, Núñez-Matas MJ, García-Erce JA: Pre-operative haemoglobin levels and iron status in a large

- multicentre cohort of patients undergoing major elective surgery. *Anaesthesia* 2017; 72:826–34
4. Baron DM, Hochrieser H, Posch M, Metnitz B, Rhodes A, Moreno RP, Pearse RM, Metnitz P; European Surgical Outcomes Study (EuSOS) group for Trials Groups of European Society of Intensive Care Medicine; European Society of Anaesthesiology: Preoperative anaemia is associated with poor clinical outcome in non-cardiac surgery patients. *Br J Anaesth* 2014; 113:416–23
  5. Ranucci M, Baryshnikova E, Castelveccchio S, Pelissero G; Surgical and Clinical Outcome Research (SCORE) Group: Major bleeding, transfusions, and anemia: the deadly triad of cardiac surgery. *Ann Thorac Surg* 2013; 96:478–85
  6. Spahn DR, Goodnough LT: Alternatives to blood transfusion. *Lancet* 2013; 381:1855–65
  7. Shander A, Hofmann A, Ozawa S, Theusinger OM, Gombotz H, Spahn DR: Activity-based costs of blood transfusions in surgical patients at four hospitals. *Transfusion* 2010; 50:753–65
  8. Isbister JP, Shander A, Spahn DR, Erhard J, Farmer SL, Hofmann A: Adverse blood transfusion outcomes: establishing causation. *Transfus Med Rev* 2011; 25:89–101
  9. Spahn DR, Moch H, Hofmann A, Isbister JP: Patient blood management: the pragmatic solution for the problems with blood transfusions. *ANESTHESIOLOGY* 2008; 109:951–3
  10. Leahy MF, Hofmann A, Towler S, Trentino KM, Burrows SA, Swain SG, Hamdorf J, Gallagher T, Koay A, Geelhoed GC, Farmer SL: Improved outcomes and reduced costs associated with a health-system-wide patient blood management program: a retrospective observational study in four major adult tertiary-care hospitals. *Transfusion* 2017; 57:1347–58
  11. Althoff FC, Neb H, Herrmann E, Trentino KM, Vernich L, Füllenbach C, Freedman J, Waters JH, Farmer S, Leahy MF, Zacharowski K, Meybohm P, Choorapoikayil S: Multimodal patient blood management program based on a three-pillar strategy: A systematic review and meta-analysis. *Ann Surg* 2019; 269:794–804
  12. Meybohm P, Herrmann E, Steinbicker AU, Wittmann M, Gruenewald M, Fischer D, Baumgarten G, Renner J, Van Aken HK, Weber CE, Mueller MM, Geisen C, Rey J, Bon D, Hintereder G, Choorapoikayil S, Oldenburg J, Brockmann C, Geissler RG, Seifried E, Zacharowski K; PBM-study Collaborators: Patient blood management is associated with a substantial reduction of red blood cell utilization and safe for patient's outcome: A prospective, multicenter cohort study with a noninferiority design. *Ann Surg* 2016; 264:203–11
  13. Rössler J, Schoenrath F, Seifert B, Kaserer A, Spahn GH, Falk V, Spahn DR: Iron deficiency is associated with higher mortality in patients undergoing cardiac surgery: A prospective study. *Br J Anaesth* 2020; 124:25–34
  14. Cappellini MD, Comin-Colet J, de Francisco A, Dignass A, Doehner W, Lam CS, Macdougall IC, Rogler G, Camaschella C, Kadir R, Kassebaum NJ, Spahn DR, Taher AT, Musallam KM; IRON CORE Group: Iron deficiency across chronic inflammatory conditions: International expert opinion on definition, diagnosis, and management. *Am J Hematol* 2017; 92:1068–78
  15. Weiss G, Ganz T, Goodnough LT: Anemia of inflammation. *Blood* 2019; 133:40–50
  16. Muñoz M, Gómez-Ramírez S, Cuenca J, García-Erce JA, Iglesias-Aparicio D, Haman-Alcober S, Ariza D, Naveira E: Very-short-term perioperative intravenous iron administration and postoperative outcome in major orthopedic surgery: A pooled analysis of observational data from 2547 patients. *Transfusion* 2014; 54:289–99
  17. Litton E, Xiao J, Ho KM: Safety and efficacy of intravenous iron therapy in reducing requirement for allogeneic blood transfusion: Systematic review and meta-analysis of randomised clinical trials. *BMJ* 2013; 347:f4822
  18. Froessler B, Palm P, Weber I, Hodyl NA, Singh R, Murphy EM: The important role for intravenous iron in perioperative patient blood management in major abdominal surgery: A randomized controlled trial. *Ann Surg* 2016; 264:41–6
  19. Spahn DR, Schoenrath F, Spahn GH, Seifert B, Stein P, Theusinger OM, Kaserer A, Hegemann I, Hofmann A, Maisano F, Falk V: Effect of ultra-short-term treatment of patients with iron deficiency or anaemia undergoing cardiac surgery: A prospective randomised trial. *Lancet* 2019; 393:2201–12
  20. Mueller MM, Van Remoortel H, Meybohm P, Aranko K, Aubron C, Burger R, Carson JL, Cichutek K, De Buck E, Devine D, Fergusson D, Folléa G, French C, Frey KP, Gammon R, Levy JH, Murphy MF, Ozier Y, Pavenski K, So-Osman C, Tiberghien P, Volmink J, Waters JH, Wood EM, Seifried E; ICC PBM Frankfurt 2018 Group: Patient blood management: recommendations from the 2018 Frankfurt Consensus Conference. *JAMA* 2019; 321:983–97
  21. Burns CD, Brown JP, Corwin HL, Gross I, Ozawa SJ, Shander A: Special report from the Society for the Advancement of Blood Management: The Choosing Wisely Campaign. *Anesth Analg* 2019; 129:1381–6
  22. Muñoz M, Acheson AG, Auerbach M, Besser M, Habler O, Kehlet H, Liunbruno GM, Lasocki S, Meybohm P, Rao Baikady R, Richards T, Shander A, So-Osman C, Spahn DR, Klein AA: International consensus statement on the peri-operative management of anaemia and iron deficiency. *Anaesthesia* 2017; 72:233–47
  23. Kristensen SD, Knuuti J, Saraste A, Anker S, Bøtker HE, Hert SD, Ford I, Gonzalez-Juanatey JR, Gorenek B, Heyndrickx GR, Hoefft A, Huber K, Iung B, Kjeldsen



- KP, Longrois D, Lüscher TF, Pierard L, Pocock S, Price S, Roffi M, Sirnes PA, Sousa-Uva M, Voudris V, Funck-Brentano C; Authors/Task Force Members: 2014 ESC/ESA Guidelines on non-cardiac surgery: Cardiovascular assessment and management: The Joint Task Force on non-cardiac surgery: Cardiovascular assessment and management of the European Society of Cardiology (ESC) and the European Society of Anaesthesiology (ESA). *Eur Heart J* 2014; 35:2383–431
24. Kaserer A, Schedler A, Jetter A, Seifert B, Spahn DR, Stein P, Studt JD: Risk Factors for higher-than-expected residual rivaroxaban plasma concentrations in real-life patients. *Thromb Haemost* 2018; 118:808–17
  25. Chang SH, Chou IJ, Yeh YH, Chiou MJ, Wen MS, Kuo CT, See LC, Kuo CF: Association between use of non-vitamin K oral anticoagulants with and without concurrent medications and risk of major bleeding in nonvalvular atrial fibrillation. *JAMA* 2017; 318:1250–9
  26. Godier A, Dincq AS, Martin AC, Radu A, Leblanc I, Antona M, Vasse M, Golmard JL, Mullier F, Gouin-Thibault I: Predictors of pre-procedural concentrations of direct oral anticoagulants: A prospective multicentre study. *Eur Heart J* 2017; 38:2431–9
  27. Kaserer A, Kiavaliatis GE, Braun J, Schedler A, Stein P, Rössler J, Spahn DR, Studt JD: Impact of rivaroxaban plasma concentration on perioperative red blood cell loss. *Transfusion* 2020; 60:197–205
  28. Douketis JD, Spyropoulos AC, Kaatz S, Becker RC, Caprini JA, Dunn AS, Garcia DA, Jacobson A, Jaffer AK, Kong DF, Schulman S, Turpie AG, Hasselblad V, Ortel TL; BRIDGE Investigators: Perioperative bridging anticoagulation in patients with atrial fibrillation. *N Engl J Med* 2015; 373:823–33
  29. Raval AN, Cigarroa JE, Chung MK, Diaz-Sandoval LJ, Diercks D, Piccini JP, Jung HS, Washam JB, Welch BG, Zazulia AR, Collins SP; American Heart Association Clinical Pharmacology Subcommittee of the Acute Cardiac Care and General Cardiology Committee of the Council on Clinical Cardiology; Council on Cardiovascular Disease in the Young; and Council on Quality of Care and Outcomes Research: Management of patients on non-vitamin K antagonist oral anticoagulants in the acute care and periprocedural setting: A scientific statement from the American Heart Association. *Circulation* 2017; 135:e604–33
  30. Rechenmacher SJ, Fang JC: Bridging anticoagulation: Primum non nocere. *J Am Coll Cardiol* 2015; 66:1392–403
  31. Levine GN, Bates ER, Bittl JA, Brindis RG, Fihn SD, Fleisher LA, Granger CB, Lange RA, Mack MJ, Mauri L, Mehran R, Mukherjee D, Newby LK, O’Gara PT, Sabatine MS, Smith PK, Smith SC Jr: 2016 ACC/AHA guideline focused update on duration of dual antiplatelet therapy in patients with coronary artery disease: A report of the American College of Cardiology/American Heart Association Task Force on Clinical Practice Guidelines: An update of the 2011 ACCF/AHA/SCAI guideline for percutaneous coronary intervention, 2011 ACCF/AHA guideline for coronary artery bypass graft surgery, 2012 ACC/AHA/ACP/AATS/PCNA/SCAI/STS guideline for the diagnosis and management of patients with stable ischemic heart disease, 2013 ACCF/AHA guideline for the management of ST-elevation myocardial infarction, 2014 AHA/ACC guideline for the management of patients with non-ST-elevation acute coronary syndromes, and 2014 ACC/AHA guideline on perioperative cardiovascular evaluation and management of patients undergoing noncardiac surgery. *Circulation* 2016; 134:e123–55
  32. Wąsowicz M, Syed S, Wijeyundera DN, Starzyk Ł, Grewal D, Ragoonanan T, Harsha P, Travis G, Carroll J, Karkouti K, Beattie WS: Effectiveness of platelet inhibition on major adverse cardiac events in non-cardiac surgery after percutaneous coronary intervention: A prospective cohort study. *Br J Anaesth* 2016; 116:493–500
  33. Kiran RP, Delaney CP, Senagore AJ, Millward BL, Fazio VW: Operative blood loss and use of blood products after laparoscopic and conventional open colorectal operations. *Arch Surg* 2004; 139:39–42
  34. Preisser F, Pompe RS, Salomon G, Rosenbaum C, Graefen M, Huland H, Karakiewicz PI, Tilki D: Impact of the estimated blood loss during radical prostatectomy on functional outcomes. *Urol Oncol* 2019; 37:298.e11–7
  35. Hébert PC, Carson JL: Transfusion threshold of 7 g per deciliter—the new normal. *N Engl J Med* 2014; 371:1459–61
  36. Mazer CD, Whitlock RP, Fergusson DA, Belley-Cote E, Connolly K, Khanykin B, Gregory AJ, de Medicis E, Carrier FM, McGuinness S, Young PJ, Byrne K, Villar JC, Royse A, Grocott HP, Seeberger MD, Mehta C, Lellouche F, Hare GMT, Painter TW, Fremes S, Syed S, Bagshaw SM, Hwang NC, Royse C, Hall J, Dai D, Mistry N, Thorpe K, Verma S, Juni P, Shehata N: Six-month outcomes after restrictive or liberal transfusion for cardiac surgery. *N Engl J Med* 2018
  37. Mazer CD, Whitlock RP, Fergusson DA, Hall J, Belley-Cote E, Connolly K, Khanykin B, Gregory AJ, de Medicis É, McGuinness S, Royse A, Carrier FM, Young PJ, Villar JC, Grocott HP, Seeberger MD, Fremes S, Lellouche F, Syed S, Byrne K, Bagshaw SM, Hwang NC, Mehta C, Painter TW, Royse C, Verma S, Hare GMT, Cohen A, Thorpe KE, Juni P, Shehata N; TRICS Investigators and Perioperative Anesthesia Clinical Trials Group: Restrictive or liberal red-cell transfusion for cardiac surgery. *N Engl J Med* 2017; 377:2133–44
  38. Meybohm P, Choorapoikayil S, Wessels A, Herrmann E, Zacharowski K, Spahn DR: Washed cell salvage in surgical patients: A review and meta-analysis

- of prospective randomized trials under PRISMA. *Medicine* (Baltimore) 2016; 95:e4490
39. Barile L, Fominskiy E, Di Tomasso N, Alpizar Castro LE, Landoni G, De Luca M, Bignami E, Sala A, Zangrillo A, Monaco F: Acute normovolemic hemodilution reduces allogeneic red blood cell transfusion in cardiac surgery: A systematic review and meta-analysis of randomized trials. *Anesth Analg* 2017; 124:743–52
  40. Spahn DR, Bouillon B, Cerny V, Duranteau J, Filipescu D, Hunt BJ, Komadina R, Maegele M, Nardi G, Riddez L, Samama CM, Vincent JL, Rossaint R: The European guideline on management of major bleeding and coagulopathy following trauma: Fifth edition. *Crit Care* 2019; 23:98
  41. Wikkelsø A, Wetterslev J, Møller AM, Afshari A: Thromboelastography (TEG) or thromboelastometry (ROTEM) to monitor haemostatic treatment versus usual care in adults or children with bleeding. *Cochrane Database Syst Rev* 2016: CD007871
  42. Stein P, Kaserer A, Sprengel K, Wanner GA, Seifert B, Theusinger OM, Spahn DR: Change of transfusion and treatment paradigm in major trauma patients. *Anaesthesia* 2017; 72:1317–26
  43. Cohen J, Scorer T, Wright Z, Stewart IJ, Sosnov J, Pidcock H, Fedyk C, Kwan H, Chung KK, Heegard K, White C, Cap A: A prospective evaluation of thromboelastometry (ROTEM) to identify acute traumatic coagulopathy and predict massive transfusion in military trauma patients in Afghanistan. *Transfusion* 2019; 59(S2):1601–7
  44. McNamara H, Kenyon C, Smith R, Mallaiah S, Barclay P: Four years' experience of a ROTEM®-guided algorithm for treatment of coagulopathy in obstetric haemorrhage. *Anaesthesia* 2019; 74:984–91
  45. Callum J, Farkouh ME, Scales DC, Heddle NM, Crowther M, Rao V, Hucke HP, Carroll J, Grewal D, Brar S, Bussières J, Grocott H, Harle C, Pavenski K, Rochon A, Saha T, Shepherd L, Syed S, Tran D, Wong D, Zeller M, Karkouti K: Effect of fibrinogen concentrate vs cryoprecipitate on blood component transfusion after cardiac surgery: The FIBRES randomized clinical trial. *Jama* 2019; 1–11
  46. Levy JH, Goodnough LT: How I use fibrinogen replacement therapy in acquired bleeding. *Blood* 2015; 125:1387–93
  47. Theusinger OM, Goslings D, Studt JD, Brand-Stauffer B, Seifert B, Spahn DR, Frey BM: Quarantine *versus* pathogen-reduced plasma-coagulation factor content and rotational thromboelastometry coagulation. *Transfusion* 2017; 57:637–45
  48. Garrigue D, Godier A, Glacet A, Labreuche J, Kipnis E, Paris C, Duhamel A, Resch E, Bauters A, Machuron F, Renom P, Goldstein P, Tavernier B, Sailliol A, Susen S: French lyophilized plasma *versus* fresh frozen plasma for the initial management of trauma-induced coagulopathy: A randomized open-label trial. *J Thromb Haemost* 2018; 16:481–9
  49. Weber CF, Görlinger K, Meininger D, Herrmann E, Bingold T, Moritz A, Cohn LH, Zacharowski K: Point-of-care testing: A prospective, randomized clinical trial of efficacy in coagulopathic cardiac surgery patients. *ANESTHESIOLOGY* 2012; 117:531–47
  50. Mallaiah S, Barclay P, Harrod I, Chevannes C, Bhalla A: Introduction of an algorithm for ROTEM-guided fibrinogen concentrate administration in major obstetric haemorrhage. *Anaesthesia* 2015; 70:166–75
  51. Roberts I, Shakur H, Afolabi A, Brohi K, Coats T, Dewan Y, Gando S, Guyatt G, Hunt BJ, Morales C, Perel P, Prieto-Merino D, Woolley T: The importance of early treatment with tranexamic acid in bleeding trauma patients: An exploratory analysis of the CRASH-2 randomised controlled trial. *Lancet* 2011; 377: 1096–101, 1101 e1–2
  52. Crash-trial Collaborators: Effects of tranexamic acid on death, disability, vascular occlusive events and other morbidities in patients with acute traumatic brain injury (CRASH-3): A randomised, placebo-controlled trial. *Lancet* 2019; 394: 1713–23
  53. WOMAN Trial Collaborators: Effect of early tranexamic acid administration on mortality, hysterectomy, and other morbidities in women with post-partum haemorrhage (WOMAN): An international, randomised, double-blind, placebo-controlled trial. *Lancet* 2017; 389: 2105–16
  54. Myles PS, Smith JA, Forbes A, Silbert B, Jayarajah M, Painter T, Cooper DJ, Marasco S, McNeil J, Bussières JS, McGuinness S, Byrne K, Chan MT, Landoni G, Wallace S; ATACAS Investigators of the ANZCA Clinical Trials Network: Tranexamic acid in patients undergoing coronary-artery surgery. *N Engl J Med* 2017; 376:136–48
  55. Chornenki NLJ, Um KJ, Mendoza PA, Samienezhad A, Swarup V, Chai-Adisaksopha C, Siegal DM: Risk of venous and arterial thrombosis in nonsurgical patients receiving systemic tranexamic acid: A systematic review and meta-analysis. *Thromb Res* 2019; 179:81–6
  56. Stucchi M, Cantoni S, Piccinelli E, Savonitto S, Morici N: Anemia and acute coronary syndrome: Current perspectives. *Vasc Health Risk Manag* 2018; 14:109–18
  57. Wang Y, Shi X, Du R, Chen Y, Zhang Q: Impact of red blood cell transfusion on acute coronary syndrome: A meta-analysis. *Intern Emerg Med* 2018; 13:231–41
  58. Guedeney P, Sorrentino S, Claessen B, Mehran R: The link between anemia and adverse outcomes in patients with acute coronary syndrome. *Expert Rev Cardiovasc Ther* 2019; 17:151–9
  59. Karrowni W, Vora AN, Dai D, Wojdyla D, Dakik H, Rao SV: Blood transfusion and the risk of acute kidney injury among patients with acute coronary syndrome undergoing percutaneous coronary intervention. *Circ Cardiovasc Interv* 2016; 9:e003279
  60. Gili S, D'Ascenzo F, Lococo MF, Moretti C, Gaita F, Raposeiras-Roubín S, Abu-Assi E, Henriques JP, Saucedo J, González-Juanatey JR, Wilton SB, Kikkert

- WJ, Nuñez-Gil I, Ariza-Sole A, Song X, Alexopoulos D, Liebetrau C, Kawaji T, Huczek Z, Nie SP, Fujii T, Correia L, Kawashiri MA, García-Acuña JM, Southern D, Alfonso E, Terol B, Garay A, Zhang D, Chen Y, Xanthopoulou I, Osman N, Möllmann H, Shiomi H, Scarano S, Kowara M, Filipiak K, Wang X, Yan Y, Fan JY, Ikari Y, Nakahashi T, Sakata K, Yamagishi M, Kalpak O, Kedev S: Impact of blood transfusion on in-hospital myocardial infarctions according to patterns of acute coronary syndrome: Insights from the BleeMACS registry. *Int J Cardiol* 2016; 221:364–70
61. Khalafallah AA, Yan C, Al-Badri R, Robinson E, Kirkby BE, Ingram E, Gray Z, Khelgi V, Robertson IK, Kirkby BP: Intravenous ferric carboxymaltose *versus* standard care in the management of postoperative anaemia: A prospective, open-label, randomised controlled trial. *Lancet Haematol* 2016; 3:e415–25
  62. Kim YW, Bae JM, Park YK, Yang HK, Yu W, Yook JH, Noh SH, Han M, Ryu KW, Sohn TS, Lee HJ, Kwon OK, Ryu SY, Lee JH, Kim S, Yoon HM, Eom BW, Choi MG, Kim BS, Jeong O, Suh YS, Yoo MW, Lee IS, Jung MR, An JY, Kim HI, Kim Y, Yang H, Nam BH; FAIRY Study Group: Effect of intravenous ferric carboxymaltose on hemoglobin response among patients with acute isovolemic anemia following gastrectomy: The FAIRY randomized clinical trial. *JAMA* 2017; 317:2097–104
  63. Holm C, Thomsen LL, Norgaard A, Langhoff-Roos J: Single-dose intravenous iron infusion or oral iron for treatment of fatigue after postpartum haemorrhage: A randomized controlled trial. *Vox Sang* 2017; 112:219–28
  64. Holm C, Thomsen LL, Langhoff-Roos J: Intravenous iron isomaltoside treatment of women suffering from severe fatigue after postpartum hemorrhage. *J Matern Fetal Neonatal Med* 2018; 1–8
  65. French CJ, Glassford NJ, Gantner D, Higgins AM, Cooper DJ, Nichol A, Skrifvars MB, Imberger G, Presneill J, Bailey M, Bellomo R: Erythropoiesis-stimulating agents in critically ill trauma patients: a systematic review and meta-analysis. *Ann Surg* 2017; 265:54–62
  66. Hobisch-Hagen P, Wiedermann F, Mayr A, Fries D, Jelkmann W, Fuchs D, Hasibeder W, Mutz N, Klingler A, Schobersberger W: Blunted erythropoietic response to anemia in multiply traumatized patients. *Crit Care Med* 2001; 29:743–7
  67. Vincent JL, Baron JF, Reinhart K, Gattinoni L, Thijs L, Webb A, Meier-Hellmann A, Nolle G, Peres-Bota D; ABC (Anemia and Blood Transfusion in Critical Care) Investigators: Anemia and blood transfusion in critically ill patients. *JAMA* 2002; 288:1499–507
  68. Fischer DP, Zacharowski KD, Meybohm P: Savoring every drop – vampire or mosquito? *Crit Care* 2014; 18:306
  69. Spahn DR: Patient blood management: What else? *Ann Surg* 2019; 269:805–7
  70. Spahn DR: Patient blood management: The new standard. *Transfusion* 2017; 57:1325–7
  71. Kaserer A, Rössler J, Braun J, Farokhzad F, Pape HC, Dutkowski P, Plass A, Horisberger T, Volbracht J, Manz MG, Spahn DR: Impact of a patient blood management monitoring and feedback programme on allogeneic blood transfusions and related costs. *Anaesthesia* 2019; 74:1534–41
  72. Leahy MF, Roberts H, Mukhtar SA, Farmer S, Tovey J, Jewlachow V, Dixon T, Lau P, Ward M, Vodanovich M, Trentino K, Kruger PC, Gallagher T, Koay A, Hofmann A, Semmens JB, Towler S; Western Australian Patient Blood Management Program: A pragmatic approach to embedding patient blood management in a tertiary hospital. *Transfusion* 2014; 54:1133–45
  73. Mehra T, Seifert B, Bravo-Reiter S, Wanner G, Dutkowski P, Holubec T, Moos RM, Volbracht J, Manz MG, Spahn DR: Implementation of a patient blood management monitoring and feedback program significantly reduces transfusions and costs. *Transfusion* 2015; 55:2807–15
  74. Leahy MF, Trentino KM, May C, Swain SG, Chuah H, Farmer SL: Blood use in patients receiving intensive chemotherapy for acute leukemia or hematopoietic stem cell transplantation: The impact of a health system-wide patient blood management program. *Transfusion* 2017; 57:2189–96
